# Supplementary material for: A genome-wide association study identifies a novel locus at 6q22.1 associated with ulcerative colitis
Source: Oxford University Press journal article supplement (doi:10.1093/hmg/ddu398), 2014-07-31
Supplement: ddu398_Supplementary_Data.zip [file ddu398_Supplementary_Data.zip]

**Supplementary Table S1: Association results in the South European GWAS cohort of the 133 previously reported UC risk loci.**

| SNP        | Chr | Position(Mb) | Genes                                                        | RAF  | P-val(1)  | OR(1) | MAF(2) | P-val(2) | OR(2)           |
|------------|-----|--------------|--------------------------------------------------------------|------|-----------|-------|--------|----------|-----------------|
| rs12103    | 1   | 1.24         | <i>TNFRSF18,TNFRSF4,(30)</i>                                 | 0.18 | 7.66E-13  | 1.10  | 0.36   | 0.119    | 1.25(0.94-1.66) |
| rs10797432 | 1   | 2.5          | <i>TNFRSF14,MME1,PLCH2,(8)</i>                               | 0.52 | 2.62E-12  | 1.08  | 0.46   | 0.359    | 0.94(0.83-1.07) |
| rs35675666 | 1   | 8.02         | <i>TNFRSF9,(6)</i>                                           | 0.84 | 1.12E-15  | 1.11  | 0.13   | 0.1967   | 0.89(0.74-1.06) |
| rs6426833  | 1   | 20.15        | <i>(9)</i>                                                   | 0.54 | 2.39E-68  | 1.27  | 0.42   | 0.08359  | 0.9(0.79-1.01)  |
| rs12568930 | 1   | 22.7         | <i>(3)</i>                                                   | 0.82 | 1.26E-17  | 1.10  | 0.16   | 0.002037 | 0.78(0.66-0.91) |
| rs11209026 | 1   | 67.68        | <i>IL23R,IL12RB2,(4)</i>                                     | 0.93 | 8.12E-161 | 2.01  | 0.05   | 0.002878 | 0.67(0.51-0.87) |
| rs2651244  | 1   | 70.99        | <i>(3)</i>                                                   | 0.60 | 2.29E-08  | 1.02  | 0.39   | 0.3434   | 1.06(0.94-1.2)  |
| rs4845604  | 1   | 151.79       | <i>RORC,(14)</i>                                             | 0.86 | 3.52E-16  | 1.14  | 0.15   | 0.2371   | 0.9(0.76-1.07)  |
| rs670523   | 1   | 155.67       | <i>UBQLN4,RIT1,MSTO1,(28)</i>                                | 0.32 | 5.79E-11  | 1.06  | 0.33   | 0.8709   | 1.01(0.88-1.16) |
| rs1801274  | 1   | 161.47       | <i>FCGR2A,FCGR2B,FCGR3A,HSPA6,FCGR3B,FCRLA,(9)</i>           | 0.51 | 2.12E-38  | 1.12  | 0.45   | 0.03255  | 0.88(0.77-0.99) |
| rs4656958  | 1   | 160.85       | <i>CD48,SLAMF1,ITLN1,CD244,F11R,USF1,SLAMF7,ARHGAP30,(8)</i> | 0.69 | 6.80E-09  | 1.06  | 0.29   | 0.4538   | 0.95(0.83-1.09) |
| rs2488389  | 1   | 197.6        | <i>C1orf53,(2)</i>                                           | 0.22 | 8.45E-13  | 1.12  | 0.24   | 0.3344   | 1.07(0.93-1.24) |
| rs2816958  | 1   | 200.09       | <i>(3)</i>                                                   | 0.89 | 1.98E-17  | 1.23  | 0.10   | 0.006225 | 0.76(0.63-0.93) |
| rs7554511  | 1   | 200.87       | <i>KIF21B,(6)</i>                                            | 0.73 | 1.24E-32  | 1.16  | 0.20   | 5.19E-06 | 0.71(0.61-0.82) |
| rs3024505  | 1   | 206.93       | <i>IL10,IL20,IL19,IL24,PIGR,MAPKAPK2,FAIM3,RASSF5,(3)</i>    | 0.16 | 6.66E-42  | 1.21  | 0.15   | 0.05886  | 1.18(0.99-1.41) |
| rs6545800  | 2   | 25.12        | <i>ADCY3,(6)</i>                                             | 0.45 | 6.14E-16  | 1.11  | 0.46   | 0.5934   | 1.03(0.91-1.17) |
| rs925255   | 2   | 28.61        | <i>FOSL2,BRE,(1)</i>                                         | 0.56 | 2.67E-15  | 1.09  | 0.44   | 0.6299   | 1.03(0.91-1.17) |
| rs10495903 | 2   | 43.81        | <i>(5)</i>                                                   | 0.13 | 8.03E-12  | 1.09  | 0.13   | 0.6734   | 1.04(0.87-1.25) |
| rs7608910  | 2   | 61.2         | <i>REL,C2orf74,KIAA1841,AHSA2,(6)</i>                        | 0.39 | 8.65E-32  | 1.14  | 0.44   | 0.1646   | 1.09(0.96-1.24) |
| rs6740462  | 2   | 65.67        | <i>SPRED2,(1)</i>                                            | 0.74 | 2.35E-08  | 1.08  | 0.22   | 0.02022  | 0.84(0.73-0.97) |
| rs917997   | 2   | 102.86       | <i>IL1R2,IL18RAP,IL18R1,IL1R1,IL1RL1,IL1RL2,(3)</i>          | 0.23 | 3.12E-20  | 1.10  | 0.26   | 0.7625   | 1.02(0.89-1.17) |
| rs2111485  | 2   | 163.1        | <i>IFIH1,(5)</i>                                             | 0.40 | 1.93E-08  | 1.07  | 0.41   | 0.8836   | 1.01(0.89-1.14) |
| rs1517352  | 2   | 191.92       | <i>STAT1,STAT4,(2)</i>                                       | 0.60 | 3.28E-11  | 1.08  | 0.42   | 0.5913   | 1.03(0.91-1.17) |
| rs1016883  | 2   | 198.65       | <i>RFTN2,PLCL1,(7)</i>                                       | 0.82 | 2.87E-08  | 1.10  | 0.21   | 0.09924  | 0.88(0.76-1.02) |
| rs17229285 | 2   | 199.7        | <i>0</i>                                                     | 0.50 | 1.73E-13  | 1.12  | 0.52   | 0.05072  | 1.13(1-1.29)    |
| rs2382817  | 2   | 219.14       | <i>SLC11A1,CXCR2,CXCR1,PNKD,ARPC2,TMBIM1,CTDSP1,(8)</i>      | 0.41 | 3.70E-12  | 1.07  | 0.45   | 0.9804   | 1(0.88-1.13)    |
| rs3749171  | 2   | 241.57       | <i>GPR35,(12)</i>                                            | 0.17 | 3.07E-21  | 1.14  | 0.18   | 3.99E-05 | 1.42(1.2-1.68)  |
| rs4256159  | 3   | 18.76        | <i>0</i>                                                     | 0.14 | 9.00E-15  | 1.11  | 0.11   | 0.1377   | 1.16(0.95-1.41) |
| rs3197999  | 3   | 48.96        | <i>MST1,PFKFB4,MST1R,UCN2,GPX1,IP6K2,BSN,IP6K1,USP4,(56)</i> | 0.30 | 1.01E-47  | 1.18  | 0.38   | 7.68E-07 | 1.38(1.21-1.56) |
| rs9847710  | 3   | 53.05        | <i>PRKCD,ITIH4,(8)</i>                                       | 0.42 | 1.05E-08  | 1.06  | 0.44   | 0.5556   | 1.04(0.92-1.17) |
| rs2472649  | 4   | 74.85        | <i>CXCL5,CXCL1,CXCL3,IL8,CXCL6,PF4,CXCL2,PF4V1,(3)</i>       | 0.82 | 2.57E-08  | 1.10  | 0.17   | 0.1918   | 0.9(0.77-1.05)  |
| rs3774959  | 4   | 103.51       | <i>NFKB1,MANBA,(2)</i>                                       | 0.36 | 3.66E-12  | 1.12  | 0.37   | 0.0971   | 1.11(0.98-1.26) |
| rs7657746  | 4   | 123.22       | <i>IL2,IL21,(2)</i>                                          | 0.75 | 2.76E-13  | 1.12  | 0.24   | 0.04696  | 0.87(0.75-1)    |
| rs11739663 | 5   | 0.59         | <i>SLC9A3,(8)</i>                                            | 0.76 | 1.81E-08  | 1.07  | 0.21   | 0.4525   | 0.94(0.81-1.1)  |
| rs2930047  | 5   | 10.69        | <i>DAP,(2)</i>                                               | 0.38 | 1.03E-08  | 1.07  | 0.40   | 0.356    | 1.06(0.94-1.2)  |

|            |    |         |                                                             |      |           |      |      |           |                 |
|------------|----|---------|-------------------------------------------------------------|------|-----------|------|------|-----------|-----------------|
| rs11742570 | 5  | 40.38   | PTGER4,(1)                                                  | 0.61 | 1.81E-82  | 1.20 | 0.36 | 0.2962    | 0.93(0.82-1.06) |
| rs1363907  | 5  | 96.24   | ERAP2,ERAP1,LNPEP,(2)                                       | 0.41 | 5.62E-13  | 1.07 | 0.39 | 0.8792    | 0.99(0.87-1.12) |
| rs4836519  | 5  | 130.005 | (1)                                                         | 0.77 | 4.24E-10  | 1.07 | 0.22 | 0.1879    | 1.11(0.95-1.28) |
| rs2188962  | 5  | 131.19  | IRF1,IL13,CSF2,SLC22A4,IL4,IL3,IL5,PDLIM4,SLC22A5,ACSL6,(8) | 0.43 | 1.35E-52  | 1.16 | 0.45 | 0.679     | 1.03(0.91-1.16) |
| rs254560   | 5  | 134.44  | (6)                                                         | 0.40 | 2.55E-09  | 1.06 | 0.41 | 0.02311   | 1.16(1.02-1.31) |
| rs6863411  | 5  | 141.51  | SPRY4,NDFIP1,(5)                                            | 0.63 | 3.59E-14  | 1.09 | 0.35 | 0.6387    | 0.97(0.85-1.1)  |
| rs11741861 | 5  | 150.27  | TNIP1,IRGM,ZNF300P1,(8)                                     | 0.09 | 2.94E-37  | 1.25 | 0.14 | 0.9999    | 1(0.84-1.19)    |
| rs6871626  | 5  | 158.8   | IL12B,(3)                                                   | 0.34 | 1.43E-42  | 1.18 | 0.31 | 0.17      | 1.13(0.95-1.34) |
| rs12654812 | 5  | 176.79  | DOK3,(17)                                                   | 0.34 | 1.68E-08  | 1.07 | 0.33 | 0.1982    | 1.11(0.95-1.31) |
| rs17119    | 6  | 14.71   | 0                                                           | 0.79 | 3.08E-11  | 1.07 | 0.25 | 0.7109    | 0.97(0.84-1.12) |
| rs9358372  | 6  | 20.77   | (2)                                                         | 0.38 | 8.66E-14  | 1.09 | 0.43 | 0.03632   | 1.14(1.01-1.29) |
| rs6927022  | 6  | 32.595  | HLA-DQB1,HLA-DRB1,HLA-DQA1,HLA-DRA,(12)                     | 0.54 | 4.71E-133 | 1.44 | 0.23 | 0.001459  | 0.71(0.57-0.88) |
| rs1847472  | 6  | 90.96   | (1)                                                         | 0.66 | 1.57E-10  | 1.06 | 0.37 | 0.9403    | 1(0.88-1.13)    |
| rs6568421  | 6  | 106.43  | (2)                                                         | 0.30 | 8.24E-20  | 1.11 | 0.29 | 0.01874   | 1.21(1.03-1.42) |
| rs3851228  | 6  | 111.82  | TRAF3IP2,FYN,REV3L,(2)                                      | 0.07 | 1.08E-13  | 1.15 | 0.08 | 0.002071  | 1.47(1.15-1.87) |
| rs6920220  | 6  | 138     | TNFAIP3,(1)                                                 | 0.21 | 1.40E-21  | 1.10 | 0.23 | 0.0008788 | 1.29(1.11-1.49) |
| rs12199775 | 6  | 143.9   | PHACTR2,(5)                                                 | 0.93 | 1.99E-08  | 1.13 | 0.06 | 0.7914    | 0.97(0.75-1.24) |
| rs1819333  | 6  | 167.37  | CCR6,RPS6KA2,RNASET2,(3)                                    | 0.52 | 6.76E-21  | 1.08 | 0.45 | 0.6765    | 0.97(0.86-1.1)  |
| rs798502   | 7  | 2.78    | CARD11,GNA12,TTYH3,(4)                                      | 0.71 | 6.09E-17  | 1.13 | 0.28 | 0.0002821 | 0.78(0.68-0.89) |
| rs4722672  | 7  | 27.22   | (14)                                                        | 0.18 | 2.06E-08  | 1.09 | 0.22 | 0.005842  | 1.24(1.06-1.44) |
| rs1456896  | 7  | 50.245  | ZBPB,IKZF1,(4)                                              | 0.69 | 7.28E-15  | 1.09 | 0.30 | 0.1272    | 0.9(0.79-1.03)  |
| rs9297145  | 7  | 98.75   | SMURF1,(6)                                                  | 0.27 | 8.21E-12  | 1.08 | 0.28 | 0.7503    | 0.98(0.85-1.12) |
| rs1734907  | 7  | 100.335 | EPO,(21)                                                    | 0.15 | 1.67E-13  | 1.11 | 0.13 | 0.5534    | 1.06(0.88-1.27) |
| rs4380874  | 7  | 107.45  | DLD,(9)                                                     | 0.41 | 2.07E-26  | 1.14 | 0.42 | 0.00636   | 1.19(1.05-1.35) |
| rs38904    | 7  | 116.89  | (6)                                                         | 0.53 | 1.31E-08  | 1.05 | 0.48 | 0.1019    | 0.9(0.8-1.02)   |
| rs4728142  | 7  | 128.57  | IRF5,TNPO3,TSPAN33,(11)                                     | 0.44 | 4.37E-14  | 1.10 | 0.49 | 0.03467   | 1.14(1.01-1.29) |
| rs921720   | 8  | 126.53  | TRIB1,(1)                                                   | 0.61 | 8.30E-20  | 1.08 | 0.42 | 0.1644    | 0.92(0.81-1.04) |
| rs1991866  | 8  | 130.62  | (2)                                                         | 0.42 | 1.65E-09  | 1.05 | 0.42 | 0.8574    | 1.01(0.89-1.15) |
| rs10758669 | 9  | 4.98    | JAK2,(4)                                                    | 0.35 | 7.88E-45  | 1.17 | 0.38 | 0.0001039 | 1.28(1.13-1.46) |
| rs4743820  | 9  | 93.92   | NFIL3,(2)                                                   | 0.70 | 3.60E-09  | 1.06 | 0.24 | 0.1442    | 0.9(0.78-1.04)  |
| rs4246905  | 9  | 117.6   | TNFSF8,TNFSF15,TNC,(2)                                      | 0.71 | 2.80E-32  | 1.14 | 0.31 | 0.9192    | 0.99(0.87-1.14) |
| rs10781499 | 9  | 139.32  | CARD9,PMPCA,SDCCAG3,INPP5E,(19)                             | 0.41 | 4.38E-56  | 1.19 | 0.42 | 0.0004352 | 1.25(1.1-1.42)  |
| rs12722515 | 10 | 6.08    | IL2RA,IL15RA,(6)                                            | 0.85 | 3.76E-10  | 1.10 | 0.11 | 0.1184    | 0.86(0.71-1.04) |
| rs1042058  | 10 | 30.72   | MAP3K8,(3)                                                  | 0.59 | 5.93E-11  | 1.08 | 0.39 | 0.02434   | 0.87(0.77-0.98) |
| rs11010067 | 10 | 35.295  | CREM,(3)                                                    | 0.35 | 2.49E-25  | 1.12 | 0.35 | 0.07884   | 1.12(0.99-1.28) |
| rs2790216  | 10 | 59.99   | CISD1,IPMK,(2)                                              | 0.78 | 8.07E-09  | 1.07 | 0.21 | 0.6817    | 1.03(0.89-1.2)  |
| rs10761659 | 10 | 64.51   | (3)                                                         | 0.54 | 6.37E-46  | 1.17 | 0.52 | 0.0001379 | 1.31(1.14-1.51) |

|            |    |        |                                             |      |          |      |      |           |                 |
|------------|----|--------|---------------------------------------------|------|----------|------|------|-----------|-----------------|
| rs2227564  | 10 | 75.67  | (13)                                        | 0.77 | 6.75E-10 | 1.08 | 0.18 | 0.2429    | 0.91(0.78-1.07) |
| rs1250546  | 10 | 81.03  | (5)                                         | 0.60 | 3.15E-18 | 1.10 | 0.33 | 0.8993    | 0.99(0.87-1.13) |
| rs6586030  | 10 | 82.25  | TSPAN14,C10orf58,(4)                        | 0.85 | 9.24E-16 | 1.12 | 0.13 | 0.5908    | 0.95(0.8-1.14)  |
| rs7911264  | 10 | 94.43  | (4)                                         | 0.52 | 2.98E-08 | 1.07 | 0.50 | 0.07018   | 1.12(0.99-1.27) |
| rs4409764  | 10 | 101.28 | NKX2-3,(6)                                  | 0.49 | 1.03E-54 | 1.18 | 0.45 | 0.1501    | 0.91(0.81-1.03) |
| rs907611   | 11 | 1.87   | TNNI2,LSP1,(17)                             | 0.32 | 2.70E-10 | 1.07 | 0.33 | 0.4269    | 1.05(0.93-1.2)  |
| rs10896794 | 11 | 58.33  | CNTF,LPXN,(8)                               | 0.76 | 6.80E-10 | 1.08 | 0.23 | 0.5749    | 0.96(0.83-1.11) |
| rs11230563 | 11 | 60.77  | CD6,CD5,PTGDR2,(12)                         | 0.65 | 9.03E-13 | 1.09 | 0.37 | 0.0004896 | 0.8(0.71-0.91)  |
| rs4246215  | 11 | 61.56  | C11orf9,FADS1,FADS2,(12)                    | 0.34 | 1.93E-15 | 1.08 | 0.31 | 0.8146    | 0.98(0.86-1.13) |
| rs559928   | 11 | 64.12  | CCDC88B,RPS6KA4,TRPT1,FLRT1,(20)            | 0.82 | 4.19E-11 | 1.10 | 0.15 | 0.4796    | 0.94(0.79-1.11) |
| rs2231884  | 11 | 65.65  | RELA,FOSL1,CTSW,SNX32,(22)                  | 0.16 | 2.91E-10 | 1.08 | 0.18 | 0.371     | 1.08(0.92-1.26) |
| rs2155219  | 11 | 76.29  | (5)                                         | 0.51 | 4.24E-36 | 1.15 | 0.44 | 0.1483    | 0.91(0.8-1.03)  |
| rs6592362  | 11 | 87.12  | (1)                                         | 0.25 | 2.32E-08 | 1.08 | 0.22 | 0.3555    | 1.08(0.91-1.28) |
| rs483905   | 11 | 96.02  | JRKL,MAML2,(2)                              | 0.29 | 1.21E-08 | 1.06 | 0.30 | 0.2783    | 0.93(0.81-1.06) |
| rs561722   | 11 | 114.38 | FAM55A,FAM55D,(5)                           | 0.66 | 5.15E-17 | 1.12 | 0.31 | 0.0007577 | 0.79(0.7-0.91)  |
| rs630923   | 11 | 118.74 | CXCR5,(17)                                  | 0.85 | 7.07E-09 | 1.07 | 0.16 | 0.4659    | 0.94(0.8-1.11)  |
| rs11612508 | 12 | 12.65  | LOH12CR1,(8)                                | 0.27 | 1.06E-08 | 1.06 | 0.25 | 0.9687    | 1(0.87-1.15)    |
| rs11564258 | 12 | 40.77  | LRRK2,MUC19                                 | 0.03 | 6.38E-29 | 1.33 | 0.03 | 0.01381   | 1.64(1.1-2.45)  |
| rs11168249 | 12 | 48.2   | VDR,(8)                                     | 0.47 | 7.78E-09 | 1.05 | 0.47 | 0.1479    | 0.91(0.81-1.03) |
| rs7134599  | 12 | 68.49  | IFNG,IL26,IL22,(1)                          | 0.38 | 8.51E-32 | 1.10 | 0.42 | 0.0855    | 1.12(0.98-1.26) |
| rs17085007 | 13 | 27.52  | (2)                                         | 0.18 | 2.79E-19 | 1.11 | 0.17 | 0.1285    | 1.14(0.96-1.34) |
| rs941823   | 13 | 40.86  | (3)                                         | 0.76 | 2.07E-14 | 1.07 | 0.24 | 0.05296   | 0.87(0.76-1)    |
| rs9557195  | 13 | 99.95  | GPR183,GPR18,(6)                            | 0.77 | 2.37E-14 | 1.11 | 0.24 | 0.7611    | 0.98(0.85-1.13) |
| rs194749   | 14 | 69.27  | ZFP36L1,(4)                                 | 0.23 | 2.70E-10 | 1.08 | 0.20 | 0.3002    | 1.09(0.93-1.27) |
| rs4899554  | 14 | 75.7   | FOS,MLH3,(6)                                | 0.82 | 2.71E-08 | 1.08 | 0.15 | 0.9744    | 1(0.84-1.18)    |
| rs8005161  | 14 | 88.47  | GPR65,GALC,(1)                              | 0.09 | 2.35E-14 | 1.15 | 0.10 | 0.1366    | 1.17(0.95-1.43) |
| rs28374715 | 15 | 41.55  | ITPKA,NDUFAF1,NUSAP1,(8)                    | 0.74 | 2.43E-08 | 1.08 | 0.22 | 0.4387    | 0.94(0.81-1.09) |
| rs17293632 | 15 | 67.43  | SMAD3,(2)                                   | 0.24 | 5.97E-16 | 1.07 | 0.26 | 0.01051   | 1.21(1.04-1.39) |
| rs7495132  | 15 | 91.17  | CRTC3,(3)                                   | 0.89 | 9.48E-11 | 1.13 | 0.10 | 0.9834    | 1(0.81-1.23)    |
| rs529866   | 16 | 11.54  | SOCS1,LITAF,RMI2,(10)                       | 0.80 | 1.73E-16 | 1.12 | 0.15 | 0.8622    | 0.99(0.83-1.17) |
| rs7404095  | 16 | 23.86  | PRKCB,(5)                                   | 0.57 | 9.68E-10 | 1.06 | 0.42 | 0.1145    | 0.9(0.8-1.02)   |
| rs26528    | 16 | 28.595 | RABEP2,IL27,EIF3C,SULT1A1,SULT1A2,NUPR1,(9) | 0.45 | 9.65E-22 | 1.10 | 0.40 | 0.1977    | 1.08(0.96-1.23) |
| rs11150589 | 16 | 30.47  | ITGAL,(20)                                  | 0.46 | 6.04E-10 | 1.09 | 0.44 | 0.7062    | 0.97(0.85-1.11) |
| rs1728785  | 16 | 68.58  | ZFP90,(6)                                   | 0.77 | 3.71E-08 | 1.08 | 0.23 | 0.9552    | 1(0.86-1.15)    |
| rs10521318 | 16 | 86     | IRF8,(4)                                    | 0.92 | 1.41E-09 | 1.16 | 0.05 | 0.9445    | 0.99(0.75-1.3)  |
| rs3091316  | 17 | 32.59  | CCL13,CCL2,CCL11,(4)                        | 0.72 | 1.22E-26 | 1.12 | 0.23 | 0.7844    | 0.98(0.85-1.13) |
| rs12946510 | 17 | 37.91  | IKZF3,ZBPB2,GSDMB,ORMDL3,GSDMA,(12)         | 0.47 | 4.10E-38 | 1.16 | 0.44 | 0.008795  | 1.19(1.04-1.35) |

|            |    |        |                                      |      |          |      |      |          |                 |
|------------|----|--------|--------------------------------------|------|----------|------|------|----------|-----------------|
| rs12942547 | 17 | 40.53  | STAT3,STAT5B,STAT5A,(13)             | 0.58 | 5.51E-22 | 1.10 | 0.37 | 0.1569   | 0.91(0.8-1.04)  |
| rs1292053  | 17 | 57.96  | TUBD1,RPS6KB1,(9)                    | 0.45 | 8.85E-13 | 1.08 | 0.45 | 0.7292   | 1.02(0.9-1.16)  |
| rs7210086  | 17 | 70.64  | (3)                                  | 0.80 | 1.89E-09 | 1.11 | 0.18 | 0.03517  | 0.85(0.72-0.99) |
| rs1893217  | 18 | 12.8   | (6)                                  | 0.16 | 3.05E-26 | 1.17 | 0.15 | 0.4321   | 1.07(0.9-1.27)  |
| rs7240004  | 18 | 46.39  | SMAD7,(2)                            | 0.62 | 1.31E-09 | 1.06 | 0.39 | 0.4574   | 0.95(0.84-1.08) |
| rs727088   | 18 | 67.53  | CD226,(2)                            | 0.48 | 4.65E-09 | 1.08 | 0.46 | 0.6957   | 1.02(0.91-1.16) |
| rs11879191 | 19 | 10.49  | TYK2,PPAN-P2RY11,ICAM1,(25)          | 0.80 | 2.04E-18 | 1.14 | 0.18 | 0.2366   | 1.1(0.94-1.3)   |
| rs17694108 | 19 | 33.73  | CEBPG,(8)                            | 0.28 | 5.85E-15 | 1.10 | 0.22 | 0.5616   | 1.06(0.87-1.29) |
| rs1126510  | 19 | 47.12  | CALM3,(14)                           | 0.36 | 1.55E-09 | 1.08 | 0.38 | 0.1615   | 1.09(0.96-1.24) |
| rs11672983 | 19 | 55.38  | NLRP7,NLRP2,KIR2DL1,LILRB4,(15)      | 0.39 | 6.50E-11 | 1.09 | 0.41 | 0.2103   | 1.08(0.96-1.23) |
| rs6142618  | 20 | 30.75  | HCK,(10)                             | 0.56 | 6.05E-10 | 1.07 | 0.47 | 0.5658   | 1.04(0.92-1.17) |
| rs4911259  | 20 | 31.37  | DNMT3B,(8)                           | 0.38 | 1.20E-09 | 1.08 | 0.32 | 0.3123   | 1.07(0.94-1.22) |
| rs6088765  | 20 | 33.8   | PROCR,UQCC,CEP250,(8)                | 0.44 | 2.21E-08 | 1.08 | 0.47 | 0.05839  | 1.14(1-1.31)    |
| rs6017342  | 20 | 43.06  | ADA,HNF4A,(9)                        | 0.53 | 1.43E-43 | 1.23 | 0.36 | 0.9481   | 0.99(0.75-1.3)  |
| rs1569723  | 20 | 44.74  | CD40,MMP9,PLTP,(11)                  | 0.26 | 9.95E-14 | 1.09 | 0.29 | 0.1511   | 1.1(0.96-1.26)  |
| rs913678   | 20 | 48.95  | CEBPB,(5)                            | 0.66 | 4.59E-08 | 1.06 | 0.36 | 0.6658   | 1.03(0.91-1.17) |
| rs259964   | 20 | 57.82  | ZNF831,CTSZ,(5)                      | 0.46 | 1.01E-12 | 1.09 | 0.45 | 0.3988   | 1.05(0.93-1.19) |
| rs6062504  | 20 | 62.34  | TNFRSF6B,LIME1,SLC2A4RG,ZGPAT,(23)   | 0.68 | 1.09E-23 | 1.10 | 0.24 | 0.01028  | 0.83(0.72-0.96) |
| rs2823286  | 21 | 16.81  | 0                                    | 0.71 | 9.28E-30 | 1.16 | 0.31 | 0.2405   | 0.92(0.81-1.05) |
| rs2836878  | 21 | 40.46  | (3)                                  | 0.73 | 4.62E-48 | 1.18 | 0.22 | 0.002151 | 0.8(0.69-0.92)  |
| rs7282490  | 21 | 45.62  | ICOSLG,(9)                           | 0.39 | 2.35E-26 | 1.11 | 0.41 | 0.01328  | 1.17(1.03-1.33) |
| rs2266959  | 22 | 21.92  | MAPK1,YDJC,UBE2L3,RIMBP3,CCDC116,(8) | 0.19 | 1.39E-16 | 1.11 | 0.21 | 0.1496   | 1.12(0.96-1.31) |
| rs2412970  | 22 | 30.425 | LIF,OSM,MTMR3,(8)                    | 0.46 | 2.70E-14 | 1.08 | 0.49 | 0.1398   | 1.1(0.97-1.24)  |
| rs2413583  | 22 | 39.69  | ATF4,TAB1,APOBEC3G,(16)              | 0.83 | 4.40E-33 | 1.21 | 0.16 | 0.06078  | 0.85(0.73-1.01) |

Replication results of 133 reported UC risk loci. Chr: Chromosome; Mb: Megabase (middle of locus window as described in Jostins et al. Nature 2012)

Genes: Key gene/genes in the risk locus. In parenthesis (number of additional genes in locus)

RAF: Risk allele frequency in metaanalysis of Northern European ancestry populations

P-value(1): association significance in metaanalysis of Northern European ancestry populations

OR(1): Odds ratio of associated SNP in metaanalysis of Northern European ancestry populations

MAF(2): Minor allele frequency in Southern European UC GWAS

P-value(2): association significance in Southern European UC GWAS

OR(2): Odds ratio of associated SNP in Southern European UC GWAS

**Supplementary Table S2: 61 GWAS loci with significant association with UC (P<5e-4) and replication results in the independent dataset.**

| CHR      | SNP               | Locus                        | location              | pb               | OR_GWAS     | OR_REPL     | P_GWAS           | P_REPL          | P_COMB             |
|----------|-------------------|------------------------------|-----------------------|------------------|-------------|-------------|------------------|-----------------|--------------------|
| 1        | rs11804649        | <i>FLJ36116</i>              | flanking 3'UTR        | 113348570        | 1.47        | 1.1         | 0.0000316        | 0.143           | 0.00006            |
| 1        | rs964555          | <i>SELL</i>                  | intron                | 169671088        | 0.67        | 0.99        | 0.000064         | 0.48            | 0.00035            |
| 1        | rs9659337         | <i>SIPA1L2</i>               | flanking 3'UTR        | 232379496        | 0.73        | 1.01        | 0.000082         | 0.56            | 0.0005             |
| <b>2</b> | <b>rs11679592</b> | <b><i>MYT1L</i></b>          | <b>flanking 5'UTR</b> | <b>2406488</b>   | <b>1.28</b> | <b>1.16</b> | <b>0.000064</b>  | <b>0.0097</b>   | <b>0.0000094</b>   |
| 2        | rs12990137        | <i>LOC729769</i>             | flanking 3'UTR        | 26223547         | 1.29        | 0.97        | 0.000058         | 0.67            | 0.00043            |
| 2        | rs17537701        | <i>LOC130865</i>             | flanking 5'UTR        | 60928367         | 0.74        | 0.95        | 0.000077         | 0.277           | 0.000251           |
| <b>2</b> | <b>rs8179646</b>  | <b><i>GPD2</i></b>           | <b>flanking 3'UTR</b> | <b>157598678</b> | <b>1.31</b> | <b>1.17</b> | <b>0.000037</b>  | <b>0.0094</b>   | <b>0.0000055</b>   |
| 2        | rs11694601        | <i>OLA1</i>                  | intron                | 174949358        | 1.28        | 1           | 0.00012          | 0.48            | 0.00062            |
| 2        | rs6756374         | <i>SLC39A10</i>              | intron                | 196587670        | 1.29        | 0.91        | 0.000199         | 0.92            | 0.00176            |
| 3        | rs4234517         | <i>FBLN2</i>                 | flanking 3'UTR        | 13756808         | 0.75        | 1.01        | 0.000107         | 0.59            | 0.00067            |
| <b>3</b> | <b>rs358803</b>   | <b><i>CACNA2D3-WNT5A</i></b> | <b>flanking 3'UTR</b> | <b>55318709</b>  | <b>1.27</b> | <b>1.13</b> | <b>0.00033</b>   | <b>0.034</b>    | <b>0.000141</b>    |
| 3        | rs11130567        | <i>SPATA12</i>               | flanking 5'UTR        | 57074119         | 0.78        | 1.03        | 0.000071         | 0.69            | 0.00053            |
| 3        | rs1835898         | <i>PRICKLE2</i>              | intron                | 64121290         | 0.78        | 1.07        | 0.000092         | 0.86            | 0.00082            |
| 3        | rs169059          | <i>MAGI1</i>                 | intron                | 65780364         | 1.44        | 1.13        | 0.000049         | 0.095           | 0.000061           |
| 3        | rs9288930         | <i>PLCXD2</i>                | intron                | 111538899        | 1.3         | 1.05        | 0.000026         | 0.233           | 0.000079           |
| <b>4</b> | <b>rs11133504</b> | <b><i>Chr4q12</i></b>        | <b>flanking 3'UTR</b> | <b>58380322</b>  | <b>0.71</b> | <b>0.75</b> | <b>0.0000248</b> | <b>0.000237</b> | <b>0.000000117</b> |
| 4        | rs10022714        | <i>ATOH1</i>                 | flanking 5'UTR        | 94741522         | 1.26        | 0.89        | 0.00035          | 0.97            | 0.00308            |
| 4        | rs11724903        | <i>ODZ3</i>                  | flanking 5'UTR        | 183200145        | 0.75        | 1.01        | 0.000124         | 0.56            | 0.00073            |
| 5        | rs1030191         | <i>ODZ2</i>                  | flanking 5'UTR        | 166743702        | 1.27        | 1.08        | 0.000122         | 0.113           | 0.000168           |
| 6        | rs1737766         | <i>LOC646800</i>             | flanking 5'UTR        | 1361844          | 0.74        | 0.95        | 0.000008         | 0.234           | 0.0000267          |
| <b>6</b> | <b>rs1924466</b>  | <b><i>KIF13A</i></b>         | <b>intron</b>         | <b>17772764</b>  | <b>1.28</b> | <b>1.16</b> | <b>0.000098</b>  | <b>0.0104</b>   | <b>0.000015</b>    |
| 6        | rs2745639         | <i>KRT18P50</i>              | intron                | 96376639         | 0.74        | 0.96        | 0.00000299       | 0.258           | 0.0000117          |
| 6        | rs4440501         | <i>FRK</i>                   | flanking 3'UTR        | 116058859        | 1.25        | 0.97        | 0.00045          | 0.72            | 0.00293            |
| 7        | rs6953766         | <i>TWIST1</i>                | flanking 3'UTR        | 19134119         | 0.77        | 1.01        | 0.00033          | 0.59            | 0.00183            |
| 7        | rs2041017         | <i>7A5</i>                   | flanking 5'UTR        | 20280329         | 0.66        | 0.93        | 0.000032         | 0.252           | 0.000104           |
| 7        | rs6462063         | <i>JAZF1</i>                 | intron                | 28099570         | 1.27        | 0.86        | 0.000111         | 0.99            | 0.00111            |
| 7        | rs701308          | <i>SEMA3A</i>                | flanking 3'UTR        | 83562164         | 1.28        | 0.97        | 0.000082         | 0.7             | 0.00061            |
| <b>7</b> | <b>rs4725479</b>  | <b><i>ACTR3B</i></b>         | <b>flanking 3'UTR</b> | <b>152745810</b> | <b>0.75</b> | <b>0.84</b> | <b>0.0000049</b> | <b>0.0056</b>   | <b>0.00000051</b>  |
| 8        | rs2922861         | <i>ANGPT2</i>                | flanking 5'UTR        | 6435875          | 0.8         | 0.98        | 0.00043          | 0.4             | 0.00165            |
| 8        | rs12156170        | <i>WISP1</i>                 | flanking 5'UTR        | 134188778        | 1.34        | 0.92        | 0.000095         | 0.87            | 0.00086            |
| 9        | rs12552514        | <i>GLDC</i>                  | flanking 5'UTR        | 6665593          | 1.47        | 1.01        | 0.000079         | 0.46            | 0.00041            |
| 9        | rs9695318         | <i>LOC158345</i>             | flanking 3'UTR        | 7348292          | 0.78        | 1.13        | 0.000085         | 0.97            | 0.00086            |

|           |                  |                       |                       |                  |             |             |                 |               |                  |
|-----------|------------------|-----------------------|-----------------------|------------------|-------------|-------------|-----------------|---------------|------------------|
| 9         | rs408960         | <i>PTPRD</i>          | flanking 5'UTR        | 9069839          | 0.76        | 1.03        | 0.000233        | 0.66          | 0.0015           |
| 9         | rs843282         | <i>CYLC2</i>          | flanking 5'UTR        | 105625399        | 1.4         | 1.08        | 0.00008         | 0.191         | 0.000186         |
| 9         | rs10817777       | <i>41974</i>          | flanking 3'UTR        | 118255516        | 0.79        | 0.97        | 0.000271        | 0.34          | 0.00095          |
| <b>10</b> | <b>rs4747437</b> | <b><i>MLL710</i></b>  | <b>intron</b>         | <b>22030023</b>  | <b>1.27</b> | <b>1.17</b> | <b>0.000174</b> | <b>0.0091</b> | <b>0.0000228</b> |
| 10        | rs2489701        | <i>CCNYL2</i>         | flanking 3'UTR        | 42896183         | 0.74        | 1.16        | 0.000118        | 0.98          | 0.00116          |
| 10        | rs2642575        | <i>COL13A1</i>        | flanking 5'UTR        | 71543168         | 0.73        | 0.9         | 0.0000035       | 0.08          | 0.0000045        |
| 10        | rs869244         | <i>SHOC2</i>          | flanking 3'UTR        | 112909105        | 0.77        | 1           | 0.000064        | 0.51          | 0.00037          |
| <b>10</b> | <b>rs4246949</b> | <b><i>CPXM2</i></b>   | <b>intron</b>         | <b>125517080</b> | <b>0.76</b> | <b>0.82</b> | <b>0.000106</b> | <b>0.004</b>  | <b>0.0000067</b> |
| 11        | rs2450129        | <i>GAB2</i>           | intron                | 77940385         | 0.67        | 0.98        | 0.0000041       | 0.41          | 0.0000239        |
| 11        | rs12223674       | <i>DSCAML1</i>        | intron                | 117451256        | 0.75        | 1.12        | 0.000036        | 0.95          | 0.00038          |
| 12        | rs5745879        | <i>RFC5</i>           | intron                | 118467645        | 0.64        | 1.17        | 0.000122        | 0.91          | 0.00112          |
| 12        | rs10774497       | <i>CCDC60</i>         | intron                | 119837041        | 1.31        | 1.02        | 0.00007         | 0.4           | 0.00032          |
| 13        | rs985035         | <i>SLITRK1</i>        | flanking 3'UTR        | 84262897         | 1.3         | 0.96        | 0.0000282       | 0.77          | 0.000254         |
| 13        | rs6492073        | <i>LOC728215</i>      | intron                | 108387359        | 1.43        | 1.01        | 0.000112        | 0.48          | 0.00059          |
| 13        | rs2477466        | <i>C13orf16</i>       | flanking 5'UTR        | 111971579        | 1.34        | 1.06        | 0.000078        | 0.245         | 0.000228         |
| 14        | rs12892100       | <i>RGS6</i>           | intron                | 72478034         | 1.33        | 1.01        | 0.0000135       | 0.47          | 0.000082         |
| 15        | rs1975242        | <i>RYR3</i>           | intron                | 33801207         | 1.28        | 0.98        | 0.000086        | 0.65          | 0.0006           |
| <b>15</b> | <b>rs4776239</b> | <b><i>UNC13C</i></b>  | <b>flanking 3'UTR</b> | <b>54967175</b>  | <b>1.4</b>  | <b>1.2</b>  | <b>0.000068</b> | <b>0.017</b>  | <b>0.000017</b>  |
| 15        | rs10851649       | <i>MYO1E</i>          | intron                | 59610743         | 1.43        | 0.89        | 0.000097        | 0.9           | 0.00091          |
| 15        | rs7180683        | <i>LOC728163</i>      | flanking 5'UTR        | 85926546         | 0.72        | 0.87        | 0.000078        | 0.059         | 0.000061         |
| 16        | rs1159778        | <i>RBFOX1-TMEM114</i> | intergenic            | 8224988          | 1.43        | 0.91        | 0.000059        | 0.86          | 0.00055          |
| 17        | rs7221150        | <i>PIPOX</i>          | flanking 3'UTR        | 27387415         | 1.71        | 1.01        | 0.000042        | 0.49          | 0.00024          |
| 17        | rs4098686        | <i>FZD2</i>           | flanking 5'UTR        | 42629737         | 1.34        | 0.94        | 0.0000159       | 0.82          | 0.00016          |
| 18        | rs10503022       | <i>NEDD4L</i>         | intron                | 55991546         | 1.34        | 0.92        | 0.000119        | 0.89          | 0.00107          |
| 19        | rs945704         | <i>LONP1</i>          | intron                | 5704353          | 1.62        | 1.16        | 0.000047        | 0.114         | 0.000071         |
| 20        | rs2229205        | <i>OPRL1</i>          | coding                | 62729431         | 0.73        | 0.93        | 0.000094        | 0.224         | 0.000247         |
| 21        | rs2014791        | <i>NCAM2</i>          | flanking 3'UTR        | 23145950         | 0.78        | 1.02        | 0.000056        | 0.65          | 0.00041          |
| 21        | rs2833400        | <i>TIAM1</i>          | intron                | 32790952         | 0.74        | 0.91        | 0.000275        | 0.133         | 0.00041          |
| 21        | rs7279991        | <i>DIP2A</i>          | intron                | 47905496         | 0.78        | 0.99        | 0.000053        | 0.42          | 0.000261         |

In light grey, SNPs replicated at  $P < 0.05$  with the same effect size as in the GWAS.

CHR: chromosome; pb: pairbase; P\_COMB: combined P-value of GWAS and replication cohorts

**Supplementary Figure S1. LD patterns of SNP rs2858829 with SNPs at +/- 200 kb**

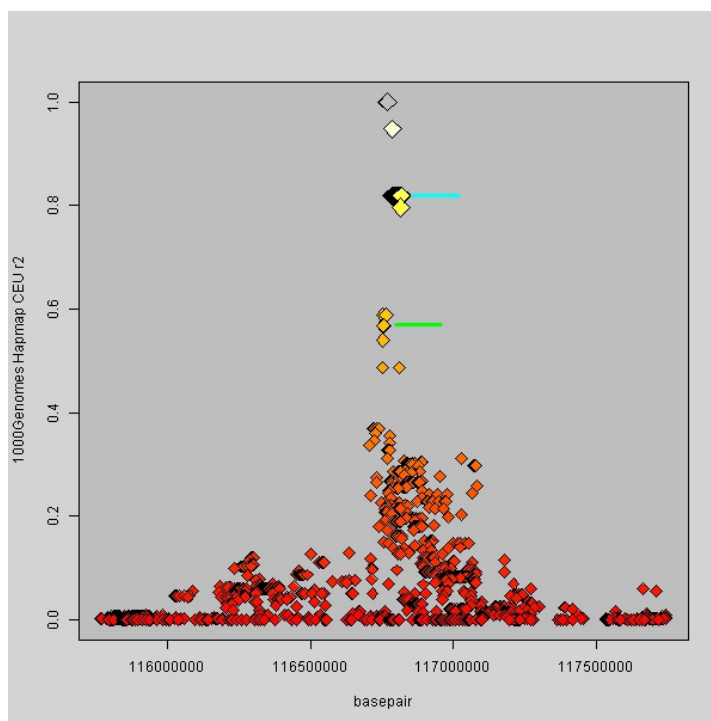

**Supplementary Figure S1. Linkage disequilibrium plot for rs2858829.** All SNPs identified in the 1KG project are plotted according to their  $r^2$  values with respect to rs2858829 (grey diamond). Heat colors go from 0 (no LD,  $r^2 = 0$ ) to yellow and white (highest LD,  $r^2 > 0.8$ ). SNPs showing significant association with the regulation of *FAM26F* gene expression are rs2858829 (blue arrow), and rs479454 (green arrow).

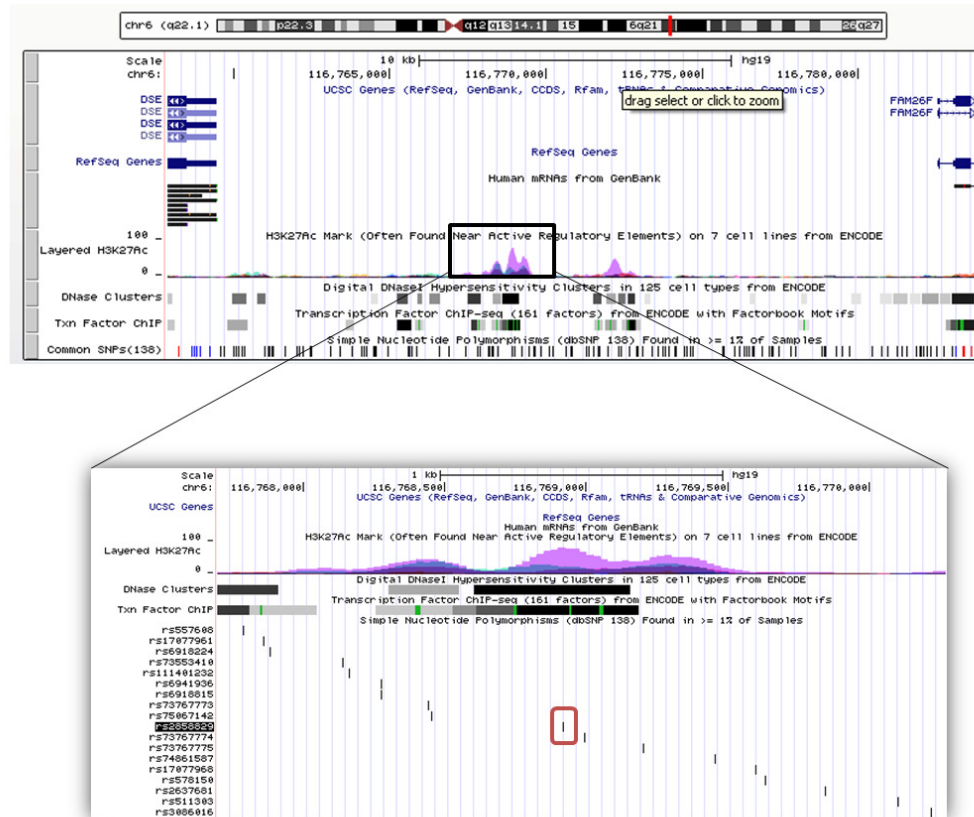

**Supplementary Figure S2. University of California Santa Cruz (UCSC) genome browser visualization of the ENCODE elements in the rs2858829 region in chromosome 6q22.1.** In the upper figure, the location of the rs2858829 SNP region in relation to the two flanking genes *DSE* and *FAM26F*. The lower figure represents the zoomed visualization of the ENCODE elements that overlap the SNP associated with risk to UC. rs2858829 SNP location is highlighted with a red box. Several regulatory elements can be found to be enriched in this particular region including high acetylation of histone H3 at lysine 27 (associated to enhancer activity), clustering of DNase hypersensitive areas (associated to gene expression regulation) and ChIP-seq derived evidence of DNA-binding motifs (associated to transcription factor function).

| Supplementary Table S3: List of UC microarray studies and FAM26F differential expression results |                    |                                                           |             |              |                              |
|--------------------------------------------------------------------------------------------------|--------------------|-----------------------------------------------------------|-------------|--------------|------------------------------|
| GEO ID                                                                                           | Species            | Comparison                                                | Probe       | Significance | Sense                        |
| GDS4365                                                                                          | <i>H. sapiens</i>  | UCActiveInvolvedMucosavsControl                           | 229391_s_at | 1.88E-05     | overexpr. in UC              |
| GDS4365                                                                                          | <i>H. sapiens</i>  | UCActiveInvolvedMucosavsControl                           | 229390_at   | 2.93E-05     | overexpr. in UC              |
| GDS4365                                                                                          | <i>H. sapiens</i>  | UCActiveInvolvedMucosavsUCActiveNon-InvolvedMucosa(pairec | 229390_at   | 3.73E-05     | overexpr. in involved mucosa |
| GDS3859                                                                                          | <i>M. musculus</i> | Day6vsDay0                                                | 1436576_at  | 6.00E-05     | overexpr. in UC              |
| GDS4365                                                                                          | <i>H. sapiens</i>  | UCActiveInvolvedMucosavsUCActiveNon-InvolvedMucosa(pairec | 229391_s_at | 2.58E-04     | overexpr. in involved mucosa |
| GDS3859                                                                                          | <i>M. musculus</i> | Day4vsDay0                                                | 1436576_at  | 0.00093      | overexpr. in UC              |
| GDS3268                                                                                          | <i>H. sapiens</i>  | UC_inflamed_descendingcolonvsNormal_uninflamed_descending | 28352       | 0.00095      | overexpr. in UC              |
| GDS3119                                                                                          | <i>H. sapiens</i>  | UC_inflamedvsNormal                                       | 229390_at   | 0.0022       | overexpr. in UC              |
| GDS3119                                                                                          | <i>H. sapiens</i>  | UC_inflamedvsNormal                                       | 229391_s_at | 0.0026       | overexpr. in UC              |
| GDS3119                                                                                          | <i>H. sapiens</i>  | UC_inflamedvsNormal                                       | 228362_s_at | 0.0037       | overexpr. in UC              |
| GDS4367                                                                                          | <i>M. musculus</i> | UCvsNormal                                                | 1436576_at  | 0.0103       | overexpr. in UC              |
| GDS4365                                                                                          | <i>H. sapiens</i>  | UCActiveInvolvedMucosavsControl                           | 229543_at   | 0.022        | overexpr. in UC              |
| GDS4365                                                                                          | <i>H. sapiens</i>  | UCActiveInvolvedMucosavsControl                           | 228362_s_at | 0.033        | overexpr. in UC              |
| GDS3119                                                                                          | <i>H. sapiens</i>  | UC_Non-inflamedvsNormal                                   | 229390_at   | 0.033        | overexpr. in UC              |
| GDS3119                                                                                          | <i>H. sapiens</i>  | UC_Non-inflamedvsNormal                                   | 229391_s_at | 0.046        | overexpr. in UC              |
| GDS3859                                                                                          | <i>M. musculus</i> | Day2vsDay0                                                | 1436576_at  | NS           | NA                           |
| GDS4270                                                                                          | <i>H. sapiens</i>  | RespondervsNon-Responder                                  | 8121596     | NS           | NA                           |
| GDS4365                                                                                          | <i>H. sapiens</i>  | UCActive_NonInvolvedMucosavsControl                       | 228362_s_at | NS           | NA                           |
| GDS4365                                                                                          | <i>H. sapiens</i>  | UCRemissionInvolvedMucosavsControl                        | 228362_s_at | NS           | NA                           |
| GDS4365                                                                                          | <i>H. sapiens</i>  | UCActive_NonInvolvedMucosavsControl                       | 229390_at   | NS           | NA                           |
| GDS4365                                                                                          | <i>H. sapiens</i>  | UCRemissionInvolvedMucosavsControl                        | 229390_at   | NS           | NA                           |
| GDS4365                                                                                          | <i>H. sapiens</i>  | UCActive_NonInvolvedMucosavsControl                       | 229391_s_at | NS           | NA                           |
| GDS4365                                                                                          | <i>H. sapiens</i>  | UCRemissionInvolvedMucosavsControl                        | 229391_s_at | NS           | NA                           |
| GDS4365                                                                                          | <i>H. sapiens</i>  | UCActive_NonInvolvedMucosavsControl                       | 229543_at   | NS           | NA                           |
| GDS4365                                                                                          | <i>H. sapiens</i>  | UCRemissionInvolvedMucosavsControl                        | 229543_at   | NS           | NA                           |
| GDS4365                                                                                          | <i>H. sapiens</i>  | UCActiveInvolvedMucosavsControl                           | 229915_at   | NS           | NA                           |
| GDS4365                                                                                          | <i>H. sapiens</i>  | UCActive_NonInvolvedMucosavsControl                       | 229915_at   | NS           | NA                           |
| GDS4365                                                                                          | <i>H. sapiens</i>  | UCRemissionInvolvedMucosavsControl                        | 229915_at   | NS           | NA                           |
| GDS4365                                                                                          | <i>H. sapiens</i>  | UCActiveInvolvedMucosavsUCActiveNon-InvolvedMucosa(pairec | 228362_s_at | NS           | NA                           |
| GDS4365                                                                                          | <i>H. sapiens</i>  | UCActiveInvolvedMucosavsUCActiveNon-InvolvedMucosa(pairec | 229543_at   | NS           | NA                           |
| GDS4365                                                                                          | <i>H. sapiens</i>  | UCActiveInvolvedMucosavsUCActiveNon-InvolvedMucosa(pairec | 229915_at   | NS           | NA                           |
| GDS3268                                                                                          | <i>H. sapiens</i>  | UC_inflamed_ascendingcolonvsNormal_uninflamed_ascendingcc | 28352       | NS           | NA                           |
| GDS3268                                                                                          | <i>H. sapiens</i>  | UC_inflamed_sigmoidcolonvsNormal_uninflamed_sigmoidcolon  | 28352       | NS           | NA                           |
| GDS3119                                                                                          | <i>H. sapiens</i>  | UC_Non-inflamedvsNormal                                   | 228362_s_at | NS           | NA                           |
| GDS3119                                                                                          | <i>H. sapiens</i>  | UC_Non-inflamedvsNormal                                   | 229543_at   | NS           | NA                           |

**Supplementary Table S5: Common genes in human and mouse FAM26F network**

| <b>Gene_Name*</b> | <b>mouse_GDS4367</b> | <b>mouse_GDS3859</b> | <b>human_GDS4365</b> | <b>human_GDS3268</b> | <b>human_GDS3119</b> |
|-------------------|----------------------|----------------------|----------------------|----------------------|----------------------|
| <b>ARHGAP25</b>   | 2.35E-05             | 0.000118312          | 0.014399671          | <1E-23               | 6.30E-09             |
| <b>ARHGDIB</b>    | 0.000128147          | 9.52E-05             | 0.001599385          | <1E-23               | 0.021863148          |
| <b>CD300A</b>     | 0.000817717          | 1.36E-06             | 1.17E-12             | <1E-23               | 1.23E-10             |
| <b>CD40</b>       | 4.90E-06             | 3.38E-06             | 4.22E-12             | <1E-23               | 1.65E-08             |
| <b>CD53</b>       | 0.000272753          | 0.000208231          | 5.31E-13             | <1E-23               | 6.06E-09             |
| <b>CD84</b>       | 0.007528962          | 5.35E-06             | 2.42E-07             | 0.004612808          | 1.26E-08             |
| <b>CIITA</b>      | 0.00024629           | 0.000816589          | 6.98E-10             | 0.01688149           | 4.58E-08             |
| <b>CORO1A</b>     | 7.30E-06             | 7.06E-05             | 1.22E-10             | <1E-23               | 8.73E-08             |
| <b>CXCL10</b>     | 6.45E-08             | 3.61E-07             | 7.55E-15             | <1E-23               | 1.29E-08             |
| <b>CXCL9</b>      | 8.15E-06             | 2.21E-08             | 8.44E-15             | <1E-23               | 2.45E-11             |
| <b>CYTIP</b>      | 9.41E-05             | 0.00019031           | 1.96E-11             | <1E-23               | 7.81E-08             |
| <b>DOCK2</b>      | 7.67E-06             | 3.53E-08             | 1.67E-10             | <1E-23               | 7.24E-08             |
| <b>GBP2</b>       | 0.000485104          | 2.61E-07             | 7.63E-11             | 1.01E-12             | 7.99E-10             |
| <b>GIMAP4</b>     | 1.33E-08             | 0.001731292          | 2.34E-09             | <1E-23               | 5.18E-08             |
| <b>GIMAP6</b>     | 6.28E-05             | 0.000360336          | 9.09E-07             | 3.51E-11             | 1.99E-06             |
| <b>GMFG</b>       | 0.000388185          | 0.000896592          | 2.39E-12             | <1E-23               | 5.96E-09             |
| <b>IL18BP</b>     | 0.00072555           | 2.18E-05             | 0.030569386          | 0.001525193          | 5.19E-08             |
| <b>LAIR1</b>      | 5.22E-07             | 0.000106098          | 9.10E-11             | 8.88E-16             | 6.58E-08             |
| <b>LAPTM5</b>     | 1.92E-05             | 2.35E-05             | 3.73E-11             | <1E-23               | 3.04E-09             |
| <b>LCP1</b>       | 0.000626194          | 3.54E-07             | 1.67E-11             | <1E-23               | 6.17E-10             |
| <b>LYN</b>        | 0.001059532          | 8.98E-05             | 4.42E-11             | <1E-23               | 2.30E-07             |
| <b>NCKAP1L</b>    | 0.00059753           | 5.98E-05             | 2.19E-12             | <1E-23               | 6.75E-10             |
| <b>PSMB9</b>      | 0.00092084           | 2.22E-06             | 4.98E-09             | 2.66E-15             | 5.63E-09             |
| <b>PTPRC</b>      | 4.02E-06             | 1.94E-06             | 1.88E-10             | <1E-23               | 0.008497052          |
| <b>RASSF5</b>     | 0.000297352          | 0.00056142           | 2.39E-07             | <1E-23               | 1.85E-07             |
| <b>SLAMF8</b>     | 1.90E-06             | 0.000223502          | 1.97E-09             | <1E-23               | 1.32E-07             |
| <b>TNFSF13B</b>   | 0.002914637          | 0.005789256          | 1.44E-11             | <1E-23               | 1.30E-07             |
| <b>WIPF1</b>      | 0.000619911          | 3.45E-06             | 7.00E-06             | <1E-23               | 1.02E-08             |

\*Genes strongly correlated with *FAM36F* expression in all human UC studies AND in all mouse UC model studies

**Supplementary Table S7: Association results of the new UC risk candidate loci in the Northern European ancestry GWAS**

| Gene           | Location           | SNP        | CHR | BP        | RISK | COF   | SCAN-P | OR(95%)         |
|----------------|--------------------|------------|-----|-----------|------|-------|--------|-----------------|
| MYT1L          | 3' flanking region | rs11679592 | 2   | 2406488   | T    | 0.488 | 0.811  | 1.01(0.96-1.05) |
| GPD2           | 3' flanking region | rs8179646  | 2   | 157598678 | C    | 0.606 | 0.763  | 1.01(0.96-1.05) |
| CACNA2D3-WNT5A | intergenic         | rs358803   | 3   | 55318709  | G    | 0.293 | 0.0603 | 1.04(1.00-1.09) |
| Chr4q12        | intergenic         | rs11133504 | 4   | 58380322  | G    | 0.825 | 0.0281 | 1.06(1.00-1.12) |
| KIF13A         | intron             | rs1924466  | 6   | 17772764  | C    | 0.553 | 0.595  | 1.01(0.97-1.05) |
| ACTR3B         | 3' flanking region | rs4725479  | 7   | 152745810 | T    | 0.427 | 0.999  | 1.00(0.96-1.04) |
| MLLT10         | intron             | rs4747437  | 10  | 22030023  | G    | 0.6   | 0.179  | 1.03(0.99-1.07) |
| CPXM2          | intron             | rs4246949  | 10  | 125517080 | T    | 0.234 | 0.521  | 1.02(0.96-1.08) |

*CHR: Chromosome, BP: Basepair; RISK: Risk Allele; COF: Frequency of risk allele in control cohort.*

*SCAN-P: P-value of association to UC risk; OR: Odds Ratio.*

**Supplementary Table S8. List of the gastroenterology departments form Spanish University Hospitals participating in the IMIDC project and in the present study**

| <b>Hospital Name</b>                        | <b>Spanish Province</b> | <b>PI</b>              |
|---------------------------------------------|-------------------------|------------------------|
| Hospital Clínico Universitario de Santiago  | La Coruña               | Manuel Barreiro        |
| Hospital Universitari Germans Trias i Pujol | Barcelona               | Eugeni Domènech        |
| Hospital Universitario Reina Sofía          | Córdoba                 | Valle García           |
| Hospital de la Santa Creu i Sant Pau        | Barcelona               | Esther García-Planella |
| Hospital General de Alicante                | Alicante                | Ana Gutiérrez          |
| Hospital Clínico San Carlos                 | Madrid                  | Juan Luís Mendoza      |
| Hospital Universitario de la Princesa       | Madrid                  | Javier Pérez-Gisbert   |
| Hospital Clínic i Provincial de Barcelona   | Barcelona               | Julià Panés            |
| Hospital Universitari i Politècnic La Fe    | Valencia                | Pilar Nos Mateu        |
| Hospital Clínico Universitario Lozano Blesa | Zaragoza                | Fernando Gomollón      |
| Complejo Hospitalario de León               | León                    | Fernando Muñoz         |
| Hospital Universitario Puerta de Hierro     | Madrid                  | Maribel Vera           |
| Mútua de Terrasa                            | Barcelona               | Maria Esteve Comas     |
| Hospital Clínico Universitario de Santiago  | La Coruña               | Manuel Barreiro        |

Gastroenterology departments participating in the IMIDC and their respective University Hospitals and geographic location in Spain (i.e. province). PI: Principal Investigator/s.

### **Supplementary Figures S3 A and S3B**

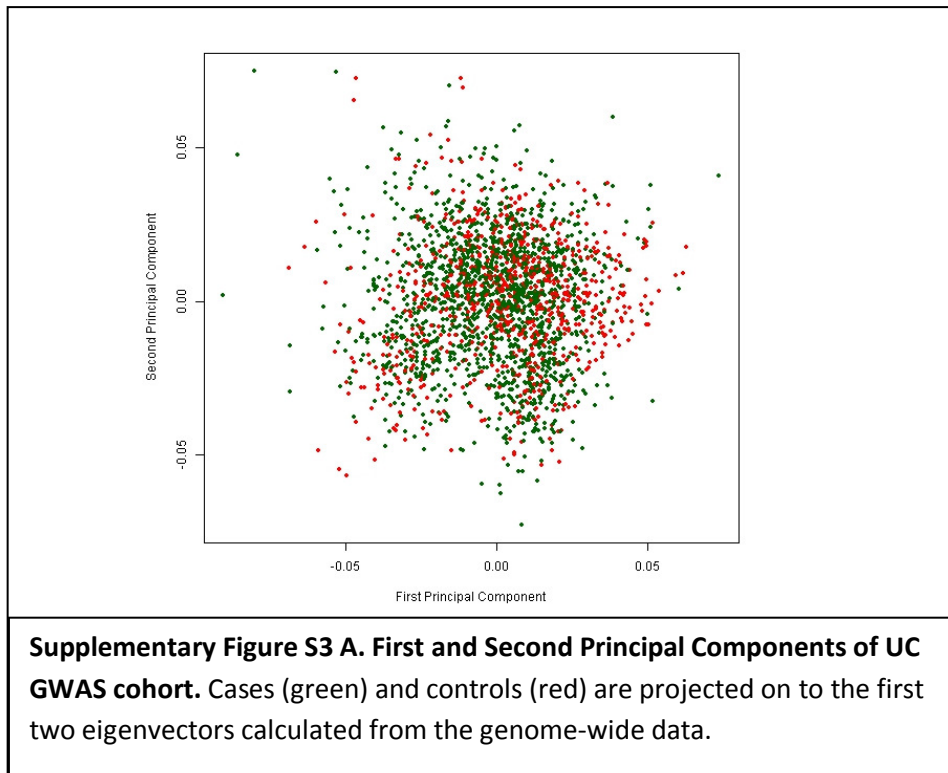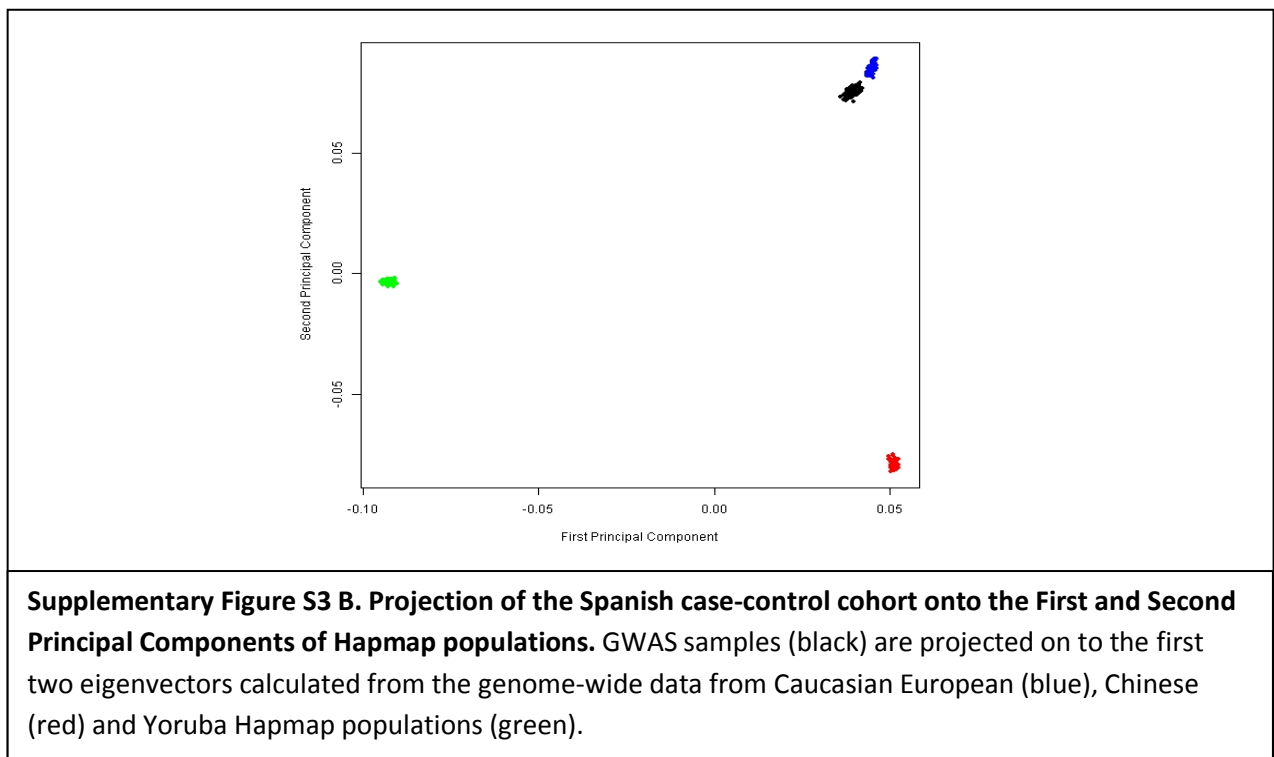

**Supplementary Table S9. List of microarray studies in ulcerative colitis and study design**

| <b>GEO<br/>Accession#</b> | <b>Reference<br/>Publ. (Pmed ID)</b> | <b>Sample<br/>origin</b> | <b>Study Design</b>                                                                                                  | <b>Sample size</b>                                                                     | <b>Differential<br/>expression?</b> |
|---------------------------|--------------------------------------|--------------------------|----------------------------------------------------------------------------------------------------------------------|----------------------------------------------------------------------------------------|-------------------------------------|
| <b>GDS4367</b>            | 22610167                             | Mouse                    | DSS induced UC vs saline<br>(control); colorectal tissue<br>obtained at 0-2-6-4-8-20 weeks.                          | 3 replicates each subgroup.                                                            | Yes.                                |
| <b>GDS3859</b>            | 20923862                             | Mouse                    | Time-series DSS-induced UC<br>(0-2-4-6 days). Colorrectal<br>tissue.                                                 | 3 replicates each subgroup.                                                            | Yes.                                |
| <b>GDS4270</b>            | 20941359                             | Human                    | Whole blood RNA, from<br>pediatric UC patients responder<br>vs non responder to IVCS<br>therapy (day 3 of treatment) | 20 replicates each subgroup.                                                           | Yes.                                |
| <b>GDS4365</b>            | 23135761                             | Human                    | Colonic biopsies from controls<br>and UC patients (involved, non-<br>involved mucosa).                               | 12 controls, 15 UC involved mucosa, 7 UC<br>non-involved mucosa and 8 UC in remission. | Yes.                                |

|                |          |       |                                                                                                                                           |                                                                                                                                                  |      |
|----------------|----------|-------|-------------------------------------------------------------------------------------------------------------------------------------------|--------------------------------------------------------------------------------------------------------------------------------------------------|------|
| <b>GDS3268</b> | 18523026 | Human | Colonic biopsies from normal controls and UC patients: inflamed/uninflamed ascending colon/descending colon/sigmoid colon/terminal ileum. | Normal (n=73: AC=17, DC=23, SC=27, TI=6),<br><br>Uninflamed UC (n=66: AC=21, DC=15, SC=15, TI=5), Inflamed UC (n=63: AC=11, DC=19, SC=32, TI=1). | Yes. |
| <b>GDS3119</b> | 19177426 | Human | Colonic mucosa from UC patients (inflamed & non-inflamed) and controls                                                                    | 5 Controls and 21 UC patients (8 inflamed).                                                                                                      | Yes. |
